# Supplementary material
Source: publisher figshare collection journal article supplement (https://acs.figshare.com/ndownloader/files/16106843)
Supplement: Supplementary file 1 [file 16106843]

## Supporting Information

### New Opportunities in Metallization Integration in Co-fired Electroceramic Multilayers by the Cold Sintering Process

Thomas Hérisson de Beauvoir, Sinan Dursun\*, Lisheng Gao and Clive Randall

Materials Research Institute, Dept. Material Science and Engineering, The Pennsylvania State University,  
University Park, 16802, PA, USA

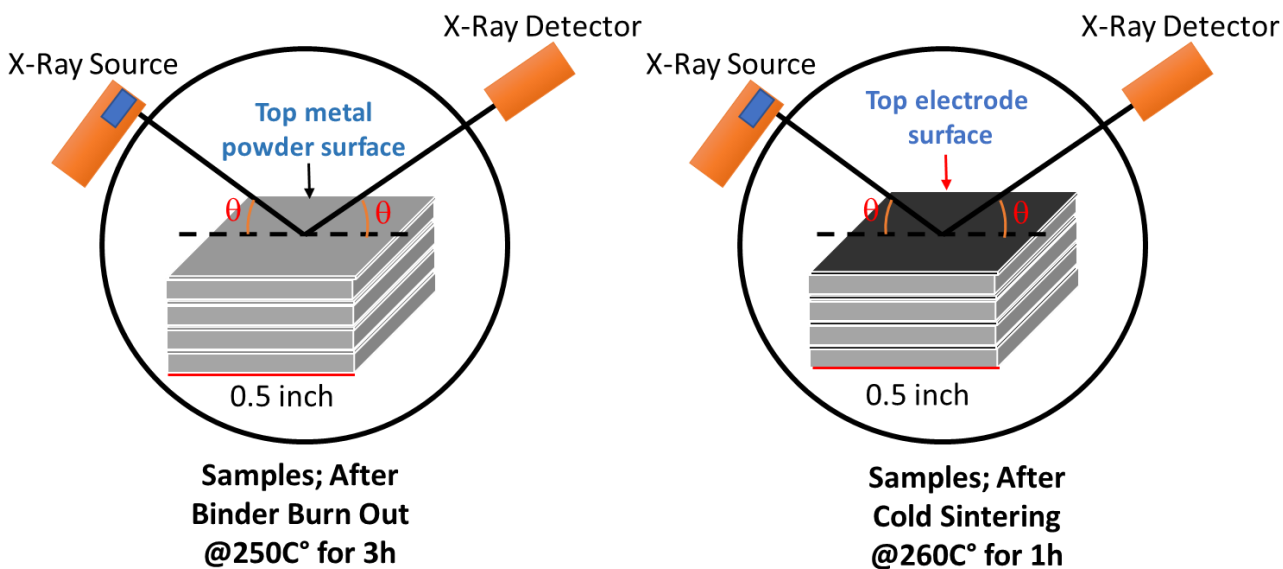

Figure S1. Schematic representation of XRD on the multilayer samples.

---

Corresponding Author

\*(S.D.) E-mail: [sxd448@psu.edu](mailto:sxd448@psu.edu),

ORCID

Sinan Dursun: 0000-0001-9270-3368

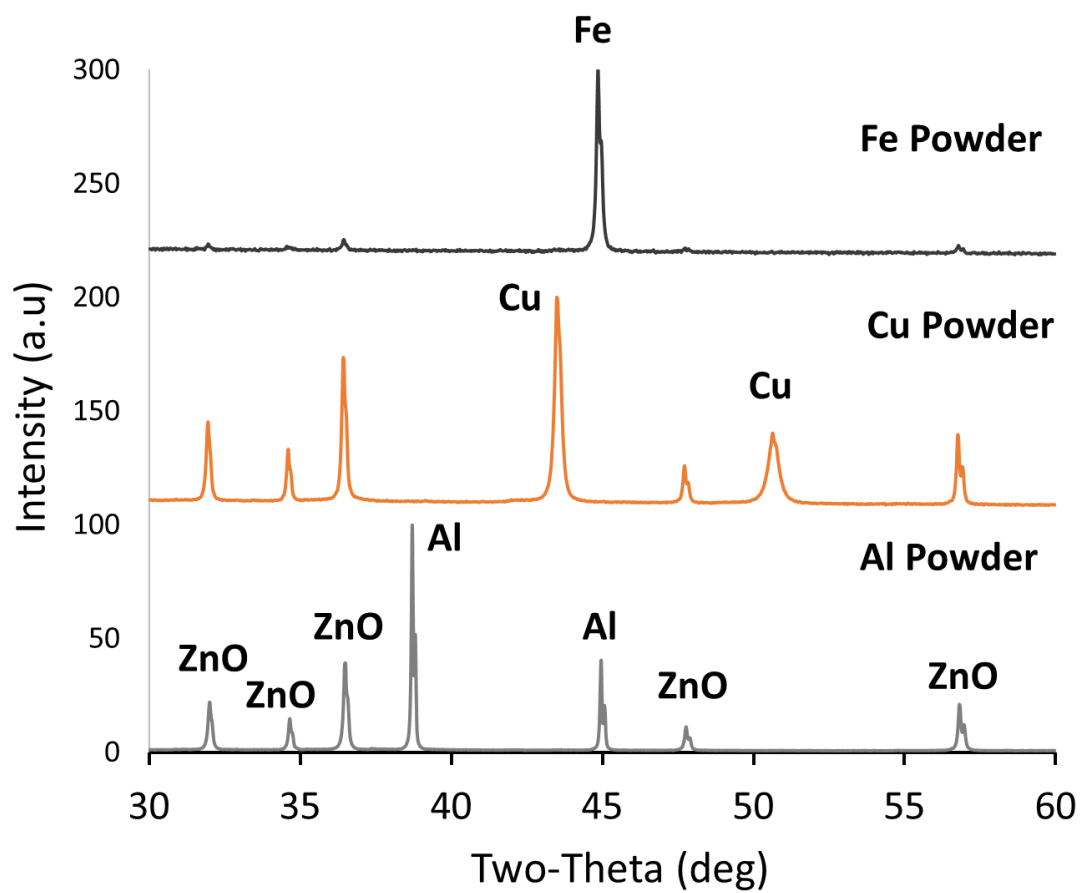

Figure S2. XRD data of the multilayer device with Al, Cu, Fe powders were carried out after BBO at 275 for 3h for the  $2\theta$  for 30°-60° angle range.

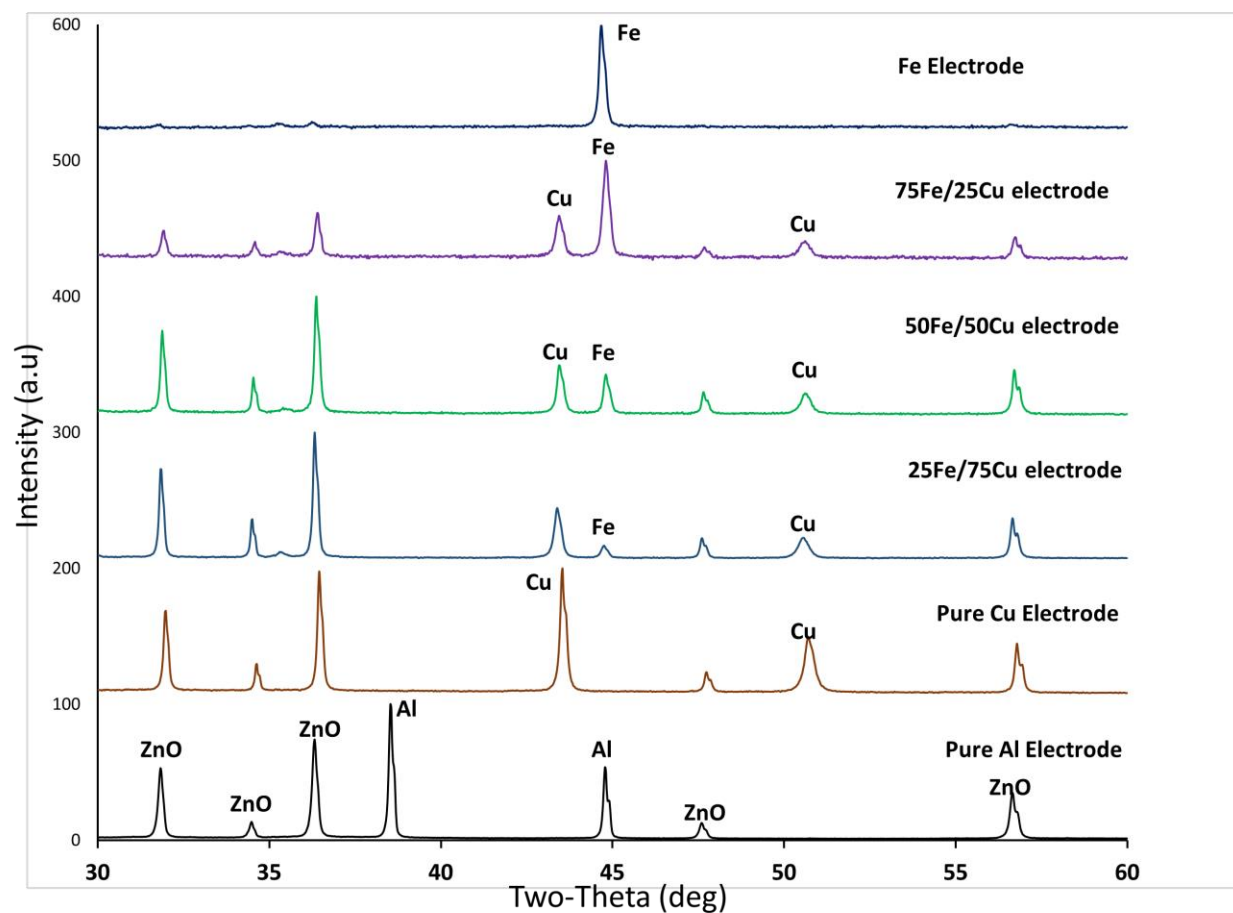

Figure S3. XRD data of the multilayer device the Al, Cu, Fe electrode metals were carried out after cold sintering at 260 for 3h for the  $2\theta$  for 30°-60° angle range.

Table S1. Activity series of metals and their oxidation reaction and energy data (Kilocalories per gram equivalent weight at 25°C)<sup>1</sup>

| Metal | Oxidation reaction                | Normal electrode Potential | Sublimation energy | Ionization energy | Hydration energy | Total (net) energy |
|-------|-----------------------------------|----------------------------|--------------------|-------------------|------------------|--------------------|
| Li    | $Li \rightarrow Li^{+} + e^{-}$   | 3.02                       | 37.1               | 125.8             | -229.4           | -66.6              |
| K     | $K \rightarrow K^{+} + e^{-}$     | 2.92                       | 21.5               | 101.6             | -183.1           | -60.0              |
| Ba    | $Ba \rightarrow Ba^{2+} + 2e^{-}$ | 2.90                       | 21.0               | 176.9             | -262.2           | -64.3              |
| Ca    | $Ca \rightarrow Ca^{2+} + 2e^{-}$ | 2.87                       | 23.0               | 208.8             | -296.1           | -64.9              |
| Na    | $Na \rightarrow Na^{+} + e^{-}$   | 2.71                       | 26.0               | 120.0             | -203.3           | -57.3              |
| Mg    | $Mg \rightarrow Mg^{2+} + 2e^{-}$ | 2.34                       | 18.0               | 262.9             | -336.1           | -55.2              |
| Al    | $Al \rightarrow Al^{3+} + 3e^{-}$ | 1.67                       | 25.0               | 410.8             | -477.6           | -41.8              |
| Zn    | $Zn \rightarrow Zn^{2+} + 2e^{-}$ | 0.76                       | 15.6               | 316.9             | -350.7           | -18.2              |
| Fe    | $Fe \rightarrow Fe^{2+} + 2e^{-}$ | 0.44                       | 48.3               | 276.7             | -335.5           | -10.5              |
| Cd    | $Cd \rightarrow Cd^{2+} + 2e^{-}$ | 0.40                       | 13.5               | 300.1             | -322.3           | -8.7               |
| Co    | $Co \rightarrow Co^{2+} + 2e^{-}$ | 0.28                       | 52.5               | 291.4             | -351.9           | -8.0               |
| Ni    | $Ni \rightarrow Ni^{2+} + 2e^{-}$ | 0.25                       | 50.8               | 299.6             | -358.1           | -7.7               |
| Pb    | $Pb \rightarrow Pb^{2+} + 2e^{-}$ | 0.13                       | 23.2               | 260.2             | -283.2           | 0.2                |
| Cu    | $Cu \rightarrow Cu^{2+} + 2e^{-}$ | -0.34                      | 40.8               | 324.2             | -357.3           | 7.7                |
| Ag    | $Ag \rightarrow Ag^{+} + e^{-}$   | -0.80                      | 69.1               | 176.2             | -220.0           | 25.3               |

Table S2. Heat of Oxidation for Potential Electrode Chemistries<sup>2</sup>

| Electrode Material | Heat of Oxidation (-kJ/mol) |
|--------------------|-----------------------------|
| Al                 | 1626                        |
| Fe                 | 823                         |
| Ni                 | 240                         |
| Cu                 | 162                         |
| Pd                 | 116                         |
| Ag                 | 31                          |
| W                  | 843                         |
| Pt                 | -169                        |
| Au                 | -3                          |

Table S3. Comparison of the ESR of different metal type reported for deposition and/or traditional thick film.

| Electrode Type | Method     | Metal Layer Thickness ( $\mu m$ ) | Firing Temperature ( $^{\circ}C$ ) | ESR ( $m\Omega/\square$ ) | Ref. |
|----------------|------------|-----------------------------------|------------------------------------|---------------------------|------|
| Cu             | Deposition | 0.16                              | -                                  | 179                       | 3    |

|          |                           |       |         |                   |              |
|----------|---------------------------|-------|---------|-------------------|--------------|
| Al       | Deposition                | 0.21  | -       | $2.4 \times 10^3$ | 4            |
| Ag/Pd    | Printed and Fired         | -     | 900     | 5                 | 5            |
| Cu       | Printed and Fired         | 25    | 925-950 | <3.0              | 6            |
| Ag/Pd/Pt | Printed and Fired         | 15-17 | 850     | 32-42             | 7            |
| Silver   | Printed and Fired         | 12    | 850     | 1.5-2.5           | 8            |
| Cu       | Printed and Cold Sintered | 5-6.5 | 260     | 6.50              | In this Work |
| Fe       | Printed and Cold Sintered | 4-5.5 | 260     | 114               | In this Work |
| Al       | Printed and Cold Sintered | 4-5.5 | 260     | $2.3 \times 10^4$ | In this Work |

## References

- (1) Kieffer, W. F. The Activity Series of the Metals. *J. Chem. Educ.* **1950**, 27 (12), 659.
- (2) Campbell, W. E.; Thomas, U. B. The Oxidation of Metals. *Trans. Electrochem. Soc.* **1947**, 91 (1), 623.
- (3) Yarimbiyik, A. E.; Schafft, H. A.; Allen, R. A.; Vaudin, M. D.; Zaghloul, M. E. Experimental and simulation studies of resistivity in nanoscale copper films. *Microelectronics Reliability*. 2009, 127-134.

(4) Panta, G.; Subedi, D. Electrical Characterization of Aluminum (Al) Thin Films Measured by Using Four- Point Probe Method. *Kathmandu Univ. J. Sci. Eng. Technol.* **2013**, 8 (2), 31–36.

(5) Baba, Y.; Ochi, H.; Segawa, S. *IEEE Transactions on Components, Packaging, and Manufacturing Technology: Part A.* **1985**, 18 (1), 170-173.

(6)

[https://www.heraeus.com/media/media/het/doc\\_het/products\\_and\\_solutions\\_het\\_documents/thick\\_film/thick\\_film\\_data\\_sheets/hybrid\\_electronics/power\\_electronics\\_led/Conductors C7403 C7404A.pdf](https://www.heraeus.com/media/media/het/doc_het/products_and_solutions_het_documents/thick_film/thick_film_data_sheets/hybrid_electronics/power_electronics_led/Conductors_C7403_C7404A.pdf) (accessed May 22, 2019)

(7) <https://www.dupont.com/content/dam/Dupont2.0/Products/Electronics-and-imaging/Literature/4093.pdf> (accessed May 22, 2019)

(8) <https://www.dupont.com/content/dam/Dupont2.0/Products/Electronics-and-imaging/Literature/QM14.pdf> (accessed May 22, 2019)
